# Supplementary material
Source: Springer Nature journal article supplement (https://www.springermedizin.de/resource/supplementary/13054_2013_3022_MOESM3_ESM.pdf/9712416)

## IAH Vote Counting Summary

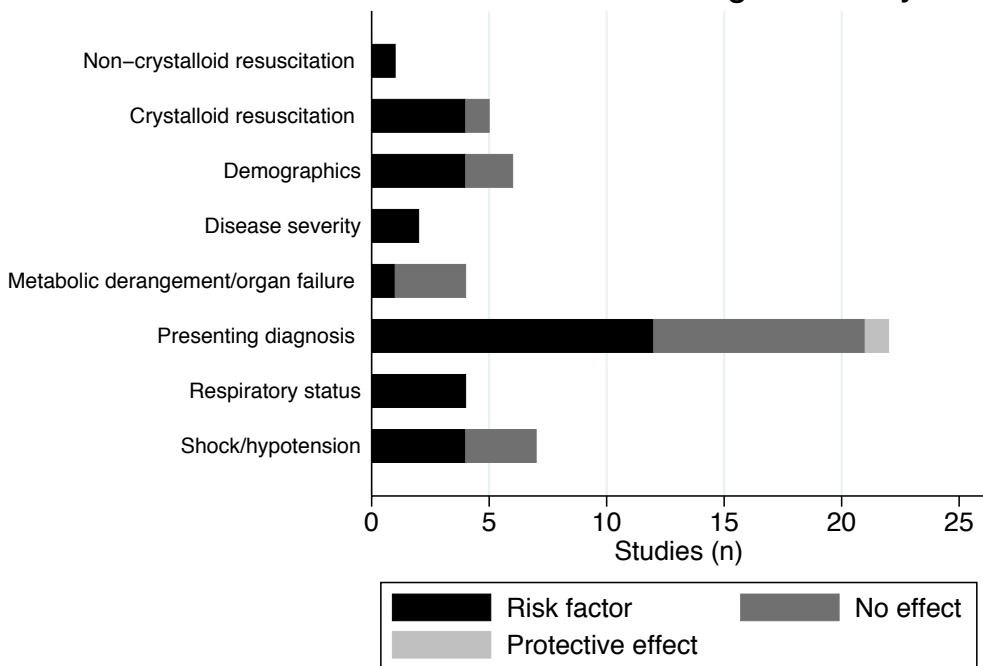

## ACS Vote Counting Summary

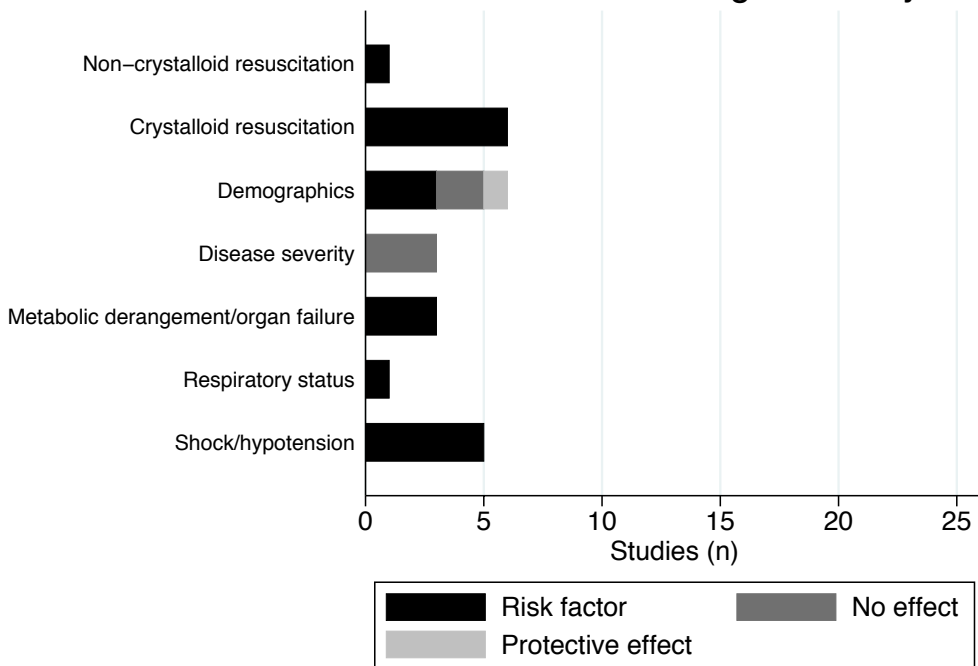

Supplement: MOESM3 [file 9712416]
